# Supplementary material for: A dual computational and experimental strategy to enhance TSLP antibody affinity for improved asthma treatment
Source: PLoS Comput Biol. 2024 Mar 27;20(3):e1011984. doi: 10.1371/journal.pcbi.1011984 (PMC10971747; doi:10.1371/journal.pcbi.1011984)
Supplement: S5 Table — (XLSX) [file pcbi.1011984.s006.xlsx]

## Sheet: Sheet1
S5 Table. The IC50 values of the mutant strains in the first round of mutations.
Mutant	IC50
L30Y	21.87
L49Y	0.6921
L49F	1.079
L90Y	3.193
L97R	~8.175
L97F	1.482
L97Y	~9.582
H52R	6.264
H52Y	3.879
H57R	29.36
H57D	~10.48
H57N	54.52
H99Y	61.12
H102Y	29.36
H102D	11.44
H105Y	417.8
T6	3.56
AMG157	0.5771
